# Supplementary material for: Acute tryptophan depletion balances altered resting-state functional connectivity of the salience network in female patients recovered from anorexia nervosa
Source: PubMed Central journal article supplement — J Psychiatry Neurosci. 2022 Oct 4;47(5):E351–8. doi: 10.1503/jpn.210161 (PMC9533767; doi:10.1503/jpn.210161), 2022-10-04
Supplement: JPN-210161-at-1.pdf [file JPN-210161-at-1.pdf]

1 **Supplementary material**

2 **1 Method**

3 **1.1 Sample**

4 General exclusion criteria were current SSRI intake, psychotropic drug intake within the last 4 weeks,  
5 being pregnant or breast feeding, anemia, being younger than 12 or 30 and older, having an IQ below  
6 85, suffering from organic brain syndrome, dementia, schizophrenia, bipolar disorder, drug abuse,  
7 obesity (BMI>97th percentile for age <18, BMI>30 for age 18 and older) as well as chronic medical or  
8 neurological illnesses that could affect appetite, eating behavior or body weight (e.g. diabetes).

9 As for the healthy controls, they were excluded if they had a lifetime diagnosis of any psychiatric  
10 disorder, the lowest lifetime BMI below the 10th percentile (below age 18) or <17.5 (for age 18 and  
11 older) or if they were currently underweight, showed abnormal eating behavior (diet, binge eating) or  
12 a binge eating disorder.

13 Patients recovered from AN were excluded if they got diagnosed with atypical AN, bulimia nervosa or  
14 binge eating disorder.

15 Due to feasibility, this study included only female participants. AN has a 10:1 female-to-male  
16 prevalence ratio [1], which is one of the most striking gender differences in psychiatry. However, this  
17 large gap between the prevalence rates presents a major challenge for research. At the same time, the  
18 comparatively low lifetime prevalence of AN (0.1% to 3.6%) and the strict criteria for defining recovery  
19 make recruitment of participants difficult. Therefore, most studies, including this one, involve only  
20 female participants.

21 **1.2 ATD mixture**

22 The dose of amino acids in the experimental mixtures were adjusted to the weight of each participant  
23 [2–5]. Experimental and sham mixtures contained the same amount of large neutral amino acids  
24 (LNAA), but differed in their tryptophan content. Accordingly, tryptophan was completely absent in  
25 the mixture of the ATD condition, while the mixture of the sham condition contained 7mg/kg body  
26 weight [recommended daily dose for adults; ,6]. The dose of large neutral amino acids (LNAA) was  
27 constant for every participant across sessions: L-phenylalanine (132 mg/kg), L-leucine (132 mg/kg), L-  
28 isoleucine (84 mg/kg), L-methionine (50 mg/kg), L-valine (96 mg/kg), L-threonine (60 mg/kg), and L-  
29 lysine (96 mg/kg).

30 Participants were informed about the bad taste of the mixtures and it was recommended to drink it all  
31 at once. If desired, participants were allowed to drink a provided tryptophan free beverage afterwards.

1 **1.3 Biochemical measures**

2 Immediately after the blood sampling, the samples were centrifuged at 4,000g and 4°C for 10 minutes.  
3 Afterwards, the plasma was stored in a -81°C fridge. Finally, blood analyses were conducted at the  
4 Institute for Clinical Chemistry and Laboratory Medicine of the Technische Universität Dresden,  
5 Medizinische Fakultät [for a detailed description, see 7]. The analyses of physiological amino acids were  
6 performed by cation exchange chromatography with post-column derivatization, using the Biochrome  
7 amino acid analyzer B30 (<http://www.biochrom.co.uk>). To avoid influences of calibration, all samples  
8 from each patient were run within one and the same series, using additional internal standard in each  
9 sample.

10 Missing values (n=3 during the first session, n=6 during the second) due to complications during blood  
11 sampling.

12 **1.4 fMRI data acquisition**

13 The parameters of the rapid acquisition gradient echo (MP-RAGE) sequence were the following:  
14 number of slices=176; repetition time=1900ms; echo time=2.26ms; flip angle=9°; slice thickness=1mm;  
15 voxel size=1x1x1mm<sup>3</sup>; field-of-view=256x224mm<sup>2</sup>; bandwidth=2004Hz/pixel.

16 The parameters of the gradient-echo T2\*-weighted echo planar imaging (EPI) were the following: tilted  
17 30° towards AC–PC line (to reduce signal dropout in orbitofrontal regions); number of volumes=190;  
18 number of slices=40; repetition time=2200ms; echo time=30ms; flip angle (FA) of 75°; 3,4mm in-plane  
19 resolution; slice thickness of 2,4mm (1mm gap resulting in a voxel size of 3,4x3,4x2,4mm<sup>3</sup>);  
20 FoV=220x220mm<sup>2</sup>; bandwidth of 200Hz/pixel.

21 **1.5 fMRI data preprocessing**

22 The applied standard image data preprocessing procedure included slice time correction of the  
23 functional data, realignment and registration to the mean. The realigned files were coregistered to the  
24 subject's structural brain image. A DARTEL template was created using structural images from all  
25 subjects. The EPI volumes were then normalized to MNI space using the DARTEL template and  
26 corresponding flow field [8]. The resulting data were smoothed with an isotropic 8mm FWHM Gaussian  
27 kernel. The quality of the fMRI data was evaluated by manual inspection and by using artifact detection  
28 tools (ART).

29 **2 Results**

30 **2.1 Main effect of group and condition**

| Main effect | Seed-region          | Brain-region     | Peak-cluster | k   | p-FWE |
|-------------|----------------------|------------------|--------------|-----|-------|
| group       | Left anterior insula | left MFG and IFG | -34, 8, 32   | 184 | 0.02  |

|           |                  |                              |               |     |       |
|-----------|------------------|------------------------------|---------------|-----|-------|
|           | ACC              | Right MFG/ frontal pole      | 28, 40, 40    | 168 | 0.045 |
|           | Left rostral PFC | Left ITG and MTG             | -54, -56, -14 | 221 | 0.011 |
|           |                  | Left lateral occipital gyrus | -22, -72, 54  | 168 | 0.037 |
|           |                  | Occipital pole               | -12, -104, 14 | 157 | 0.049 |
| condition | Left rostral PFC | Left and right thalamus      | 04, -10, 06   | 200 | 0.001 |

1 *Note.* MFG=medial frontal gyrus; IFG=inferior frontal gyrus; PFC=prefrontal cortex; ITG=inferior  
2 temporal gyrus; ACC=anterior cingulate cortex; k=number of voxels; FWE=Family-wise error.

3 **2.2 Contrasts of the extracted connectivity values of the significant cluster of the group x condition**  
4 **interaction**

| Contrast                            | t      | p-value |
|-------------------------------------|--------|---------|
| HC sham versus recAN sham           | -3.096 | 0.004   |
| HC depletion versus recAN depletion | 3.855  | <0.001  |
| HC depletion versus HC sham         | 4.449  | <0.001  |
| recAN depletion versus recAN sham   | -3.607 | 0.002   |
| HC sham versus recAN depletion      | -0.662 | 0.512   |

5 *Note.* HC=healthy control; recAN=patients recovered from Anorexia nervosa

7 **References:**

- 8 [1] Lindberg L, Hjern A. Risk factors for anorexia nervosa: A national cohort study. *Int J Eat Disord.*  
9 2003;34:397–408.
- 10 [2] Biskup CS, Sánchez CL, Arrant A, et al. Effects of Acute Tryptophan Depletion on Brain Serotonin  
11 Function and Concentrations of Dopamine and Norepinephrine in C57BL/6J and BALB/cJ Mice.  
12 Sgambato-Faure V, editor. *PLoS ONE.* 2012;7:e35916.
- 13 [3] Dingerkus VLS, Gaber TJ, Helmbold K, et al. Acute tryptophan depletion in accordance with  
14 body weight: influx of amino acids across the blood–brain barrier. *J Neural Transm.*  
15 2012;119:1037–1045.
- 16 [4] Moja EA, Stoff DM, Gessa GL, et al. Decrease in plasma tryptophan after tryptophan-free amino  
17 acid mixtures in man. *Life Sci.* 1988;42:1551–1556.
- 18 [5] Stewart RM, Wong JWY, Mahfouda S, et al. Acute Tryptophan Depletion Moja-De: A Method to  
19 Study Central Nervous Serotonin Function in Children and Adolescents. *Front Psychiatry.*  
20 2020;10:1007.
- 21 [6] Richard DM, Dawes MA, Mathias CW, et al. L-Tryptophan: Basic Metabolic Functions,  
22 Behavioral Research and Therapeutic Indications. *Int J Tryptophan Res.* 2009;2:IJTR.S2129.

Appendix 1 to Boehm I, Steding J, Ritschel F, et al. Acute tryptophan depletion balances altered resting-state functional connectivity of the salience network in female patients recovered from anorexia nervosa. *J Psychiatry Neurosci* 2022. doi: 10.1503/jpn.210161 Copyright © 2022 The Author(s) or their employer(s). To receive this resource in an accessible format, please contact us at cmajgroup@cmaj.ca. Online appendices are unedited and posted as supplied by the authors.

1 [7] Henle T, Walter H, Krause I, et al. Efficient determination of individual maillard compounds in  
2 heat-treated milk products by amino acid analysis. *Int Dairy J*. 1991;1:125–135.

3 [8] Ashburner J. A fast diffeomorphic image registration algorithm. *Neuroimage*. 2007;38:95–113.

4
